# Supplementary material for: Seed-mediated growth synthesis and tunable narrow-band luminescence of quaternary Ag–In–Ga–S alloyed nanocrystals
Source: Royal Society of Chemistry journal article supplement (doi:10.1039/d3nr06037c), 2024-01-01
Supplement: d3nr06037c1.pdf [file d3nr06037c1.pdf]

## Supporting Information

### Seed-Mediated Growth Synthesis and Tunable Narrow-band Luminescence of Quaternary Ag-In-Ga-S Alloyed Nanocrystals

*Ouyang Lin*<sup>a</sup>, *Lijin Wang*<sup>a</sup>, *Xiulin Xie*<sup>a</sup>, *Shuaibing Wang*<sup>a</sup>, *Yibo Feng*<sup>b,c</sup>, *Jiawen Xiao*<sup>c</sup>, *Yu Zhang*<sup>a\*</sup>, *Aiwei Tang*<sup>a\*</sup>

<sup>a</sup> Key Laboratory of Luminescence and Optical Information, Ministry of Education, School of Physical Science and Engineering, Beijing Jiaotong University, Beijing 100044, China

<sup>b</sup> Institute of High Energy Physics, Chinese Academy of Sciences, Beijing 100049, China

<sup>c</sup> Beijing Key Lab of Microstructure and Property of Advanced Materials, Faculty of Materials and Manufacturing, Beijing University of Technology, Beijing 100124, China

E-mail: [awtang@bjtu.edu.cn](mailto:awtang@bjtu.edu.cn); [zhyu@bjtu.edu.cn](mailto:zhyu@bjtu.edu.cn)

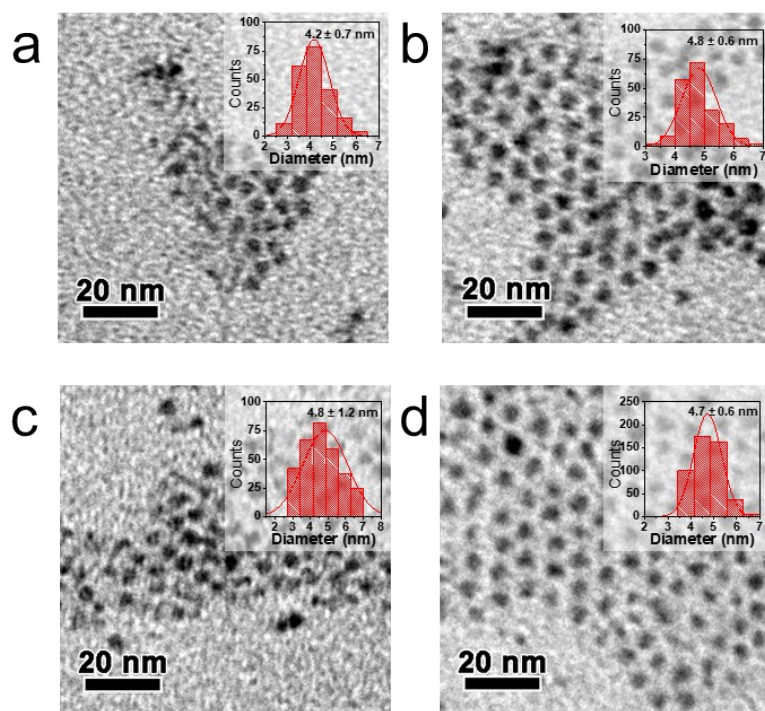

**Fig. S1** TEM images of AIGS nanocrystals without DDT (a) 250°C, (b) 280°C 0 min, (c) 280°C 15 min, (d) 280°C 30 min.

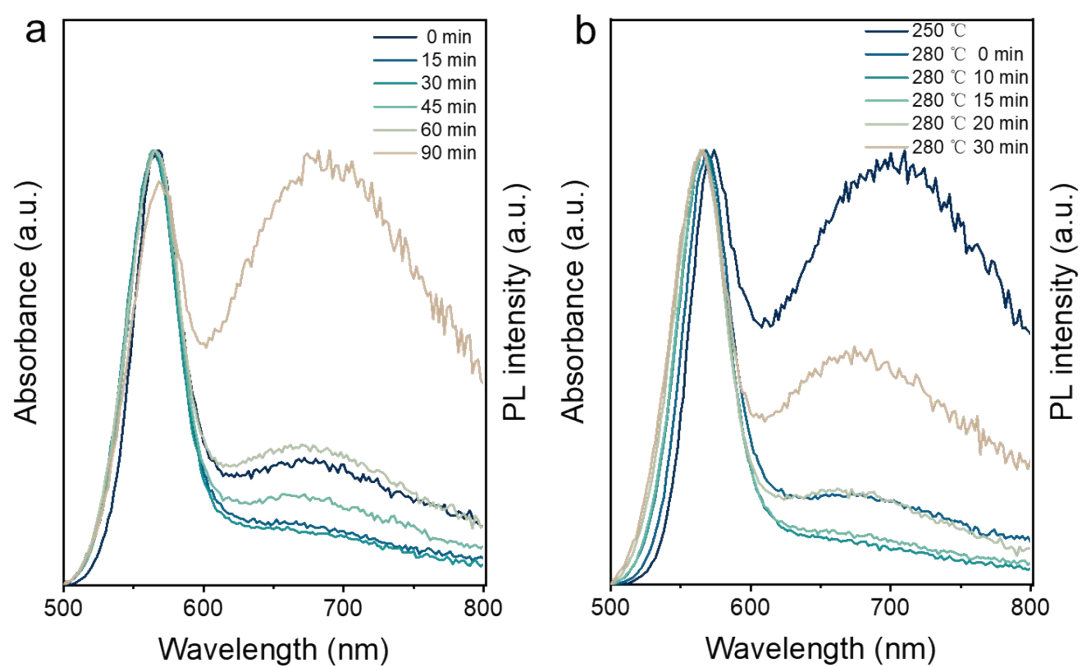

**Fig. S2** Evolution of the PL spectra of AIGS nanocrystals with different Ga precursor (a) 0.3 mmol and (b) 0.5 mmol.

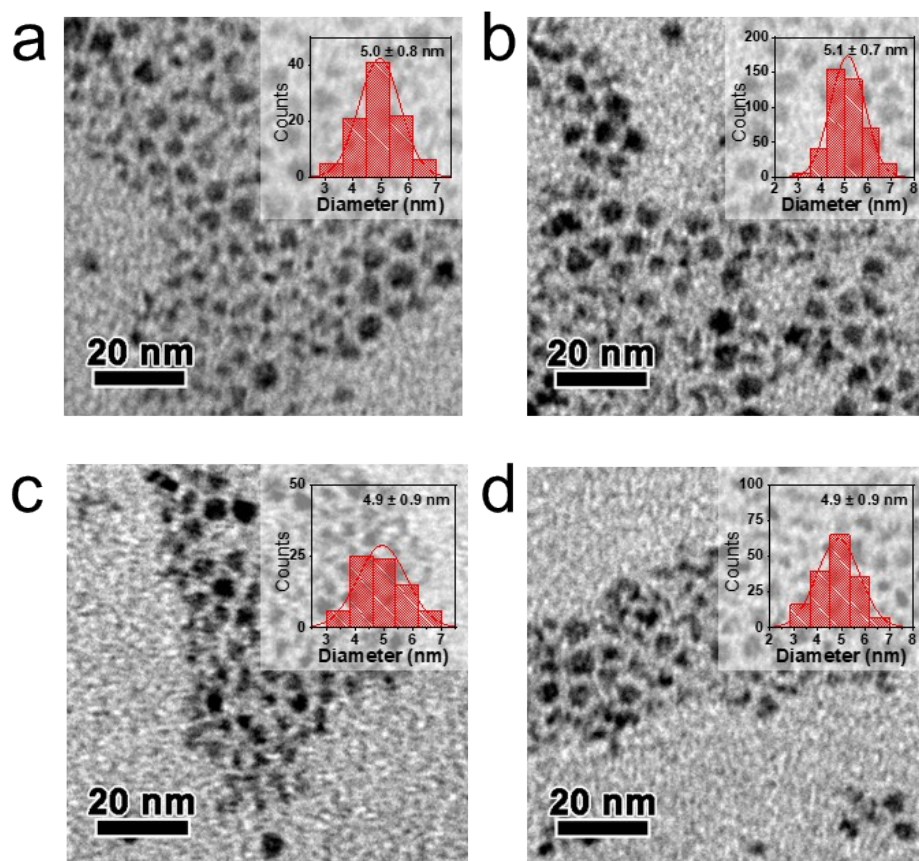

**Fig. S3** TEM images of AIGS nanocrystals with DDT (a) 0 min, (b) 30 min, (c) 60 min, (d) 120 min.

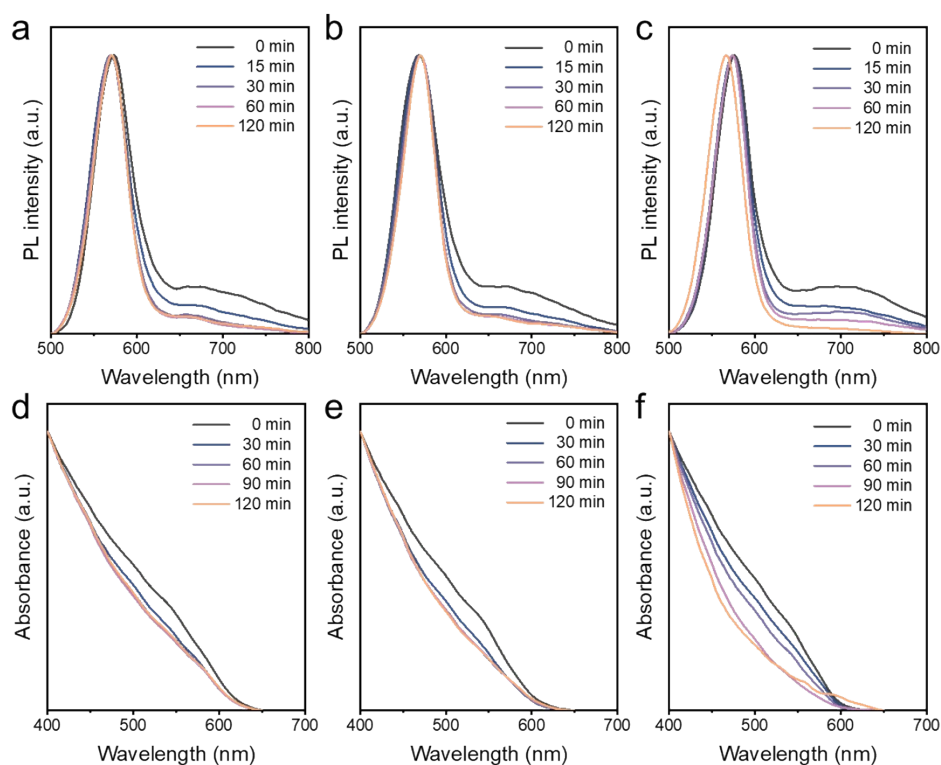

**Fig. S4** Evolution of the PL spectra of AIGS nanocrystals with different addition of DDT (a) 0.1 mL, (b) 0.2 mL and (c) 0.5 mL.

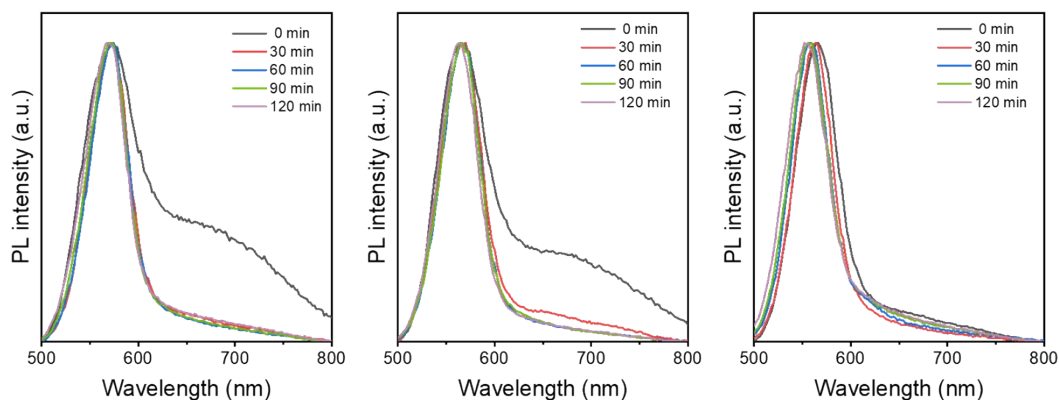

**Fig. S5.** Evolution of the PL spectra of AIGS nanocrystals with different addition of DMTU (a) 0.3 mmol, (b) 0.45 mmol and (c) 0.6 mmol.

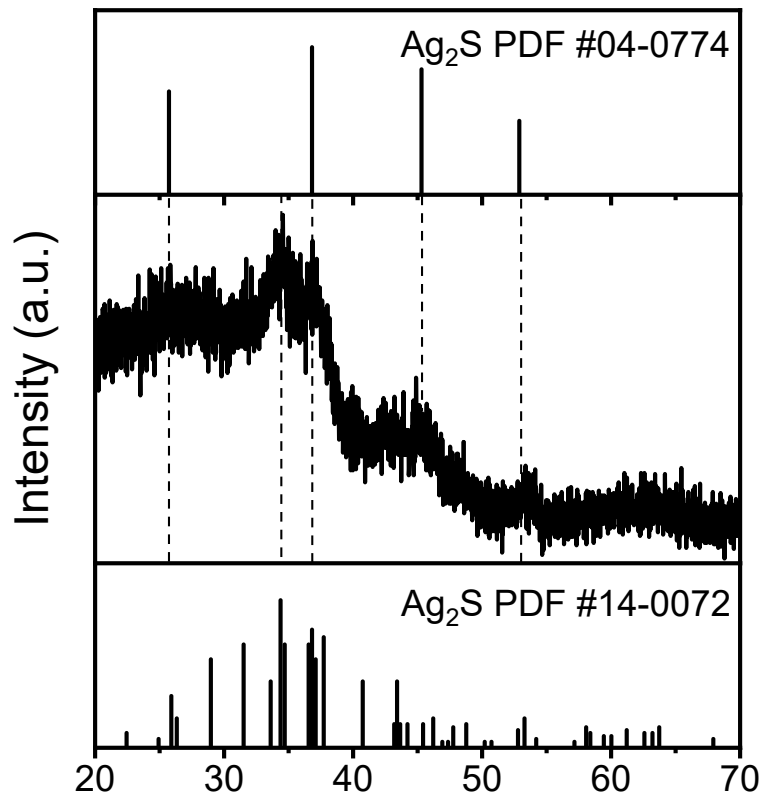

**Fig. S6** XRD patterns of precipitate produced during the synthesis in AIS seeds.

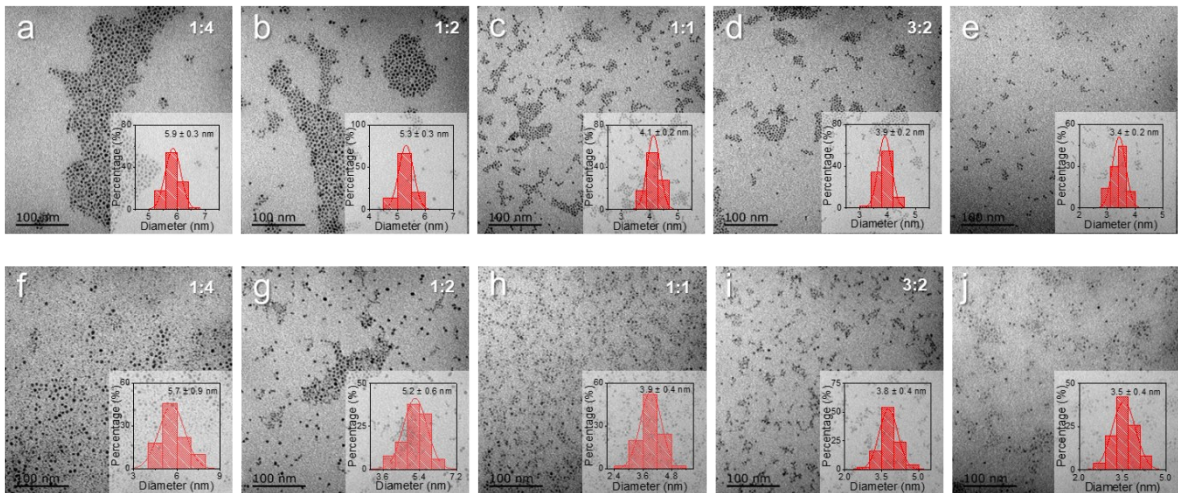

**Fig. S7** TEM images of AIS seeds synthesized with different Ag/In (a) 1:4, (b) 1:2, (c) 1:1, (d) 3:2, (e) 2:1 and corresponding AIGS nanocrystals (f) 1:4, (g) 1:2, (h) 1:1, (i) 3:2, and (j) 2:1. The insets show the size distribution.

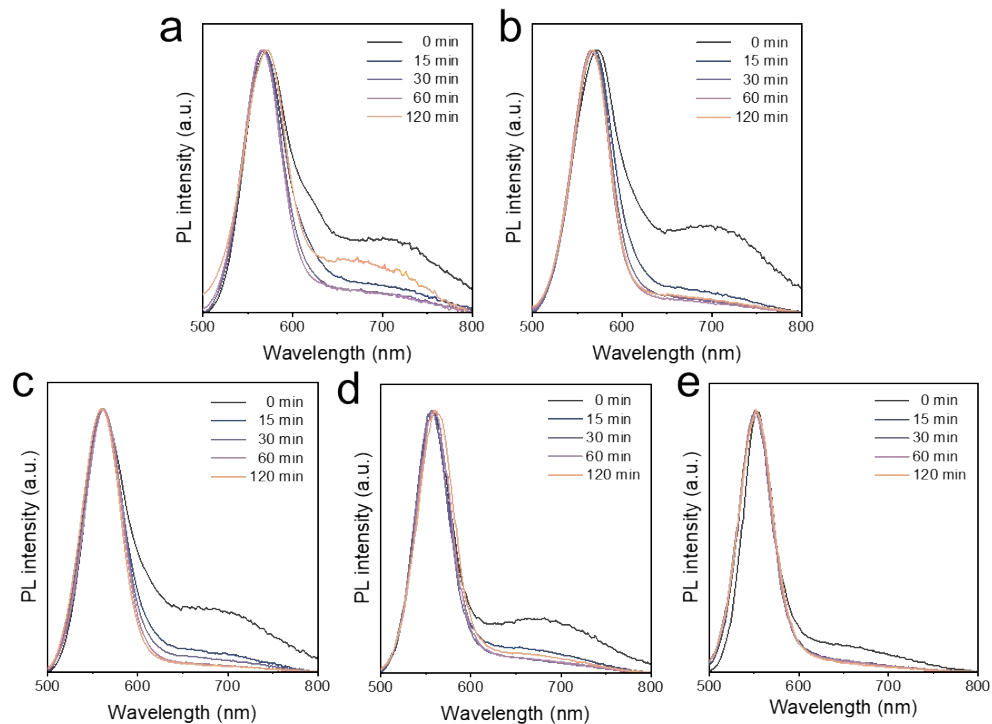

**Fig. S8** PL spectra of AIGS nanocrystals with different Ag/In when AIS seeds synthesis (a) 1:4, (b) 1:2, (c) 1:1, (d) 3:2 and (e) 2:1.

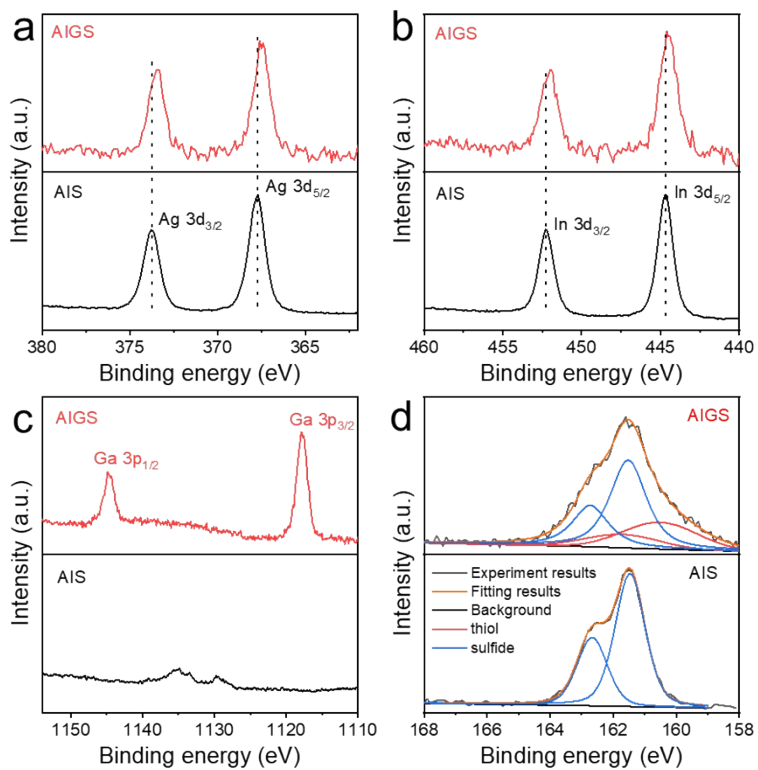

**Fig. S9** XPS results of AIS seeds (Ag:In = 1:1) and corresponding AIGS nanocrystals (a) Ag 3d, (b) In 3d, (c) Ga 3p and (d) S.

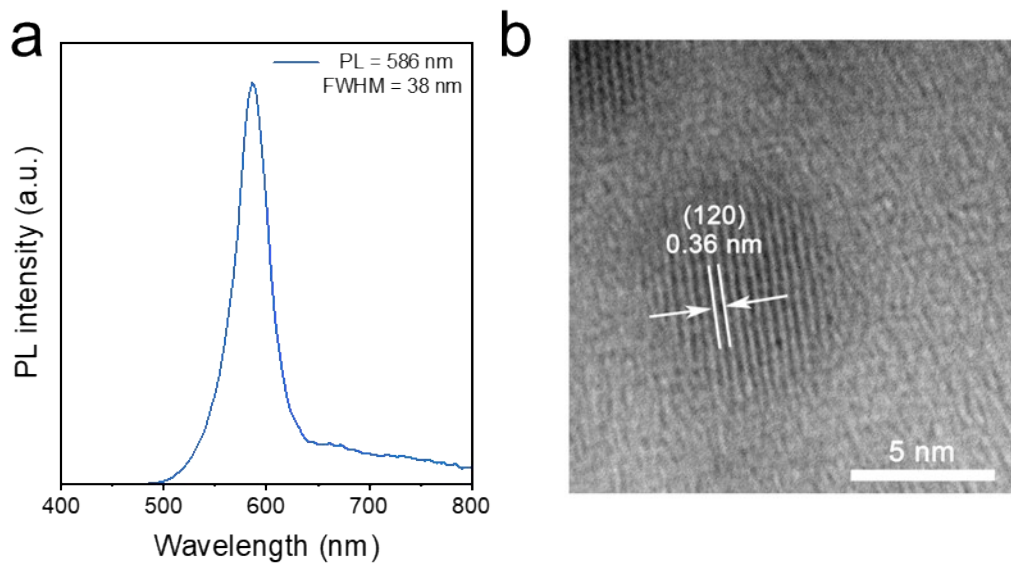

**Fig. S10** (a) PL spectra and (b)HRTEM of large size ( $\sim 8$  nm) AIGS NCs were synthesized by using an equal amount of sulfur powder as a sulfur source.

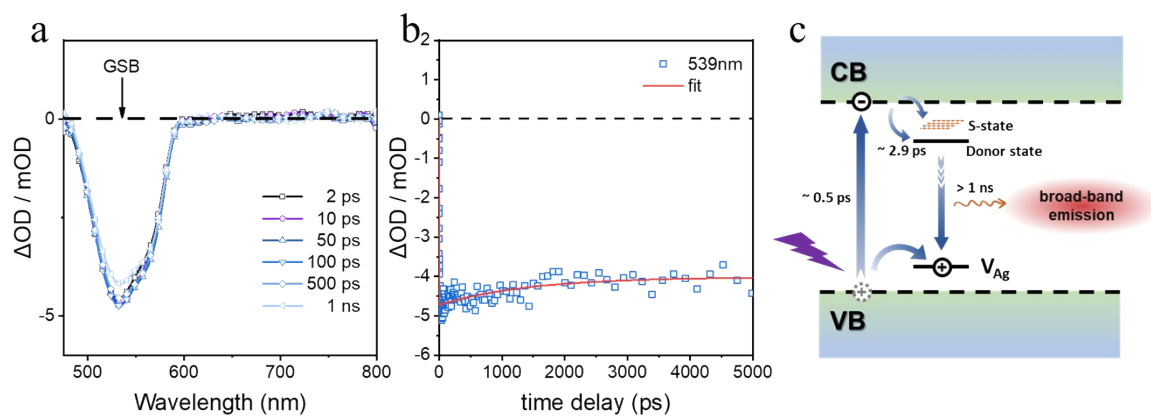

**Fig. S11.** (a) TA spectra of AIGS NCs excited by 365 nm pulses (b) TA kinetics of AIS NCs probed at the GSB ( $\sim 539$  nm) (c) Schematic illustration of the electron dynamics in AIS nanocrystals following bandgap excitation.

**Table S1.** PL decay components for AIGS NCs without 1-dodecanethiol

| Sample                                 | Reaction stage | $\tau_1/\text{ns}$ | $\alpha_1$ | $\tau_2/\text{ns}$ | $\alpha_2$ | $\tau_3/\text{ns}$ | $\alpha_3$ | $\tau_{ave}/\text{ns}$ |
|----------------------------------------|----------------|--------------------|------------|--------------------|------------|--------------------|------------|------------------------|
| Seeds (740 nm)                         | -              | 131.7              | 2.4%       | 690.7              | 42.5%      | 1548.0             | 55.1%      | 1149.8                 |
| Narrow-band luminescence peak (564 nm) | 250°C          | 5.6                | 14.8%      | 31.9               | 22.0%      | 175.9              | 63.2%      | 119.0                  |
|                                        | 0 min          | 6.8                | 6.9%       | 34.0               | 29.8%      | 151.0              | 63.4%      | 106.3                  |
|                                        | 15 min         | 10.9               | 4.1%       | 46.4               | 39.7%      | 147.5              | 56.2%      | 101.7                  |
|                                        | 30 min         | 8.5                | 4.3%       | 38.0               | 33.8%      | 151.8              | 61.9%      | 107.1                  |
| Broad-band luminescence peak (670 nm)  | 250 °C         | 5.5                | 2.2%       | 37.1               | 7.0%       | 315.6              | 90.8%      | 289.3                  |
|                                        | 0 min          | 5.6                | 3.0%       | 36.9               | 9.3%       | 281.4              | 87.6%      | 250.1                  |
|                                        | 15 min         | 5.6                | 2.2%       | 37.6               | 10.9%      | 251.5              | 86.9%      | 222.6                  |

**Table S2.** Element atomic ratio (ICP analysis) of AIGS NCs (without DDT during the AIGS NCs growth.)

| Sample   | Element | Seed  | 250°C | 0min  | 15min | 30min |
|----------|---------|-------|-------|-------|-------|-------|
| AIGS NCs | Ag      | 38.7% | 3.5%  | 4.4%  | 3.4%  | 4.5%  |
|          | Ga      | -     | 91.0% | 87.8% | 88.5% | 89.5% |
|          | In      | 61.3% | 5.5%  | 7.8%  | 8.1%  | 6.0%  |



**Table S3.** PL decay components for AIGS NCs with 1-dodecanethiol

| Sample                             | Reaction stage | $\tau_1/\text{ns}$ | $\alpha_1$ | $\tau_2/\text{ns}$ | $\alpha_2$ | $\tau_3/\text{ns}$ | $\alpha_3$ | $\tau_{ave}/\text{ns}$ |
|------------------------------------|----------------|--------------------|------------|--------------------|------------|--------------------|------------|------------------------|
| Seeds (740 nm)                     | -              | 131.7              | 2.4%       | 690.7              | 42.5%      | 1548.0             | 55.1%      | 1149.8                 |
| Narrow-band emission peak (560 nm) | 0 min          | 12.1               | 9.2%       | 46.1               | 32.2%      | 176.0              | 58.6%      | 119.0                  |
|                                    | 30 min         | 11.7               | 6.1%       | 47.7               | 39.8%      | 160.3              | 54.1%      | 106.5                  |
|                                    | 60 min         | 13.8               | 6.1%       | 48.7               | 41.0%      | 161.0              | 52.9%      | 105.9                  |
|                                    | 120 min        | 13.0               | 8.3%       | 48.8               | 42.1%      | 163.4              | 49.6%      | 102.7                  |
| Broad-band emission peak (670 nm)  | 0 min          | 5.3                | 2.7%       | 34.8               | 11.7%      | 249.1              | 85.6%      | 217.5                  |
|                                    | 30 min         | 5.2                | 3.2%       | 33.5               | 13.2%      | 234.8              | 83.5%      | 200.7                  |
|                                    | 60 min         | 5.1                | 3.9%       | 31.8               | 14.8%      | 226.9              | 81.3%      | 189.3                  |
|                                    | 120 min        | 5.1                | 3.2%       | 31.1               | 16.4%      | 209.4              | 80.4%      | 173.6                  |

**Table S4.** Element atomic ratio (ICP analysis) of AIGS NCs (with DDT during the AIGS NCs growth.)

| Sample   | Element | Seed  | 0 min | 30 min | 60 min | 120 min |
|----------|---------|-------|-------|--------|--------|---------|
| AIGS NCs | Ag      | 38.7% | 20.7% | 16.8%  | 16.5%  | 15.1%   |
|          | Ga      | -     | 55.3% | 61.2%  | 63.8%  | 66.1%   |
|          | In      | 61.3% | 24.0% | 22.0%  | 19.6%  | 18.8%   |

**Table S5.** Element atomic ratio of AIS seeds synthesized with different Ag/In and corresponding AIGS NCs

| Sample    | Element | 1:4   | 1:2   | 1:1   | 3:2   | 2:1   |
|-----------|---------|-------|-------|-------|-------|-------|
| AIS seeds | Ag      | 46.7% | 43.2% | 38.7% | 34.6% | 29.6% |
|           | In      | 53.3% | 56.8% | 61.3% | 65.4% | 70.4% |
|           | Ag/In   | 0.88  | 0.76  | 0.63  | 0.52  | 0.42  |
| AIGS NCs  | Ag      | 9.5%  | 7.7%  | 5.5%  | 4.8%  | 3.4%  |
|           | Ga      | 78.9% | 80.2% | 83.5% | 84.2% | 88.5% |
|           | In      | 11.6% | 12.1% | 11.0% | 11.0% | 8.1%  |
|           | Ag/In   | 0.82  | 0.64  | 0.5   | 0.43  | 0.42  |

**Table S6.** Stripping XPS element atomic ratio of AIGS NCs

| Sample   | Element | Step 0 | Step 1 | Step 2 | Step 3 |
|----------|---------|--------|--------|--------|--------|
| AIGS NCs | Ag      | 11.4%  | 13.7%  | 14.3%  | 14.8%  |
|          | In      | 10.8%  | 13.9%  | 14.7%  | 16.4%  |
|          | Ga      | 77.8%  | 72.4%  | 71.0%  | 68.7%  |

**Table S7.** Element atomic ratio (ICP analysis) of large-size AIGS NCs (size ~ 8 nm)

| Sample                               | Element | Seed  | AIGS  |
|--------------------------------------|---------|-------|-------|
| Large size AIGS NCs<br>(size ~ 8 nm) | Ag      | 13.1% | 11.9% |
|                                      | Ga      | -     | 46.2% |
|                                      | In      | 86.9% | 41.9% |

**Table S8.** Kinetics fitting parameters for Fig. 5.

|              | $\tau_1/\text{ns}$ | $\tau_2/\text{ns}$ | $\tau_3/\text{ns}$ |
|--------------|--------------------|--------------------|--------------------|
| GSB (524 nm) | 0.9±0.4            | 53.2±3.7           | -                  |
| SE (565 nm)  | 1.4±0.4            | 35.9±5.2           | 270±77             |

**Table S9.** Kinetics fitting parameters for Fig. S11.

|              | $\tau_1/\text{ps}$ | $\tau_2/\text{ps}$ | $\tau_3/\text{ps}$ |
|--------------|--------------------|--------------------|--------------------|
| GSB (539 nm) | 0.5 ± 0.2          | 2.9 ± 26           | 1412 ± 921         |
